# Estimating alpha, beta, and gamma diversity through deep learning

1 **Tobias Andermann** <sup>1,2,3,4\*</sup>, **Alexandre Antonelli** <sup>1,2,5,6</sup>, **Russell L. Barrett** <sup>7,8</sup>, **Daniele Silvestro**  
2 <sup>1,2,3,4</sup>

3 <sup>1</sup> Department of Biological and Environmental Sciences, University of Gothenburg, Sweden

4 <sup>2</sup> Gothenburg Global Biodiversity Centre, University of Gothenburg, Sweden

5 <sup>3</sup> Department of Biology, University of Fribourg, Switzerland

6 <sup>4</sup> Swiss Institute of Bioinformatics, Fribourg, Switzerland

7 <sup>5</sup> Department of Plant Sciences, University of Oxford, United Kingdom

8 <sup>6</sup> Royal Botanic Gardens, Kew, Richmond, Surrey, United Kingdom

9 <sup>7</sup> Royal Botanic Gardens, Sydney, New South Wales, Australia

10 <sup>8</sup> School of Biological Sciences, The University of Western Australia, Crawley, Australia

11 **\* Correspondence:**

12 Tobias Andermann

13 [tobias.andermann@bioenv.gu.se](mailto:tobias.andermann@bioenv.gu.se)

## 14 **Abstract**

15 The reliable mapping of species richness is a crucial step for the identification of areas of high  
16 conservation priority, alongside other value considerations. This is commonly done by overlapping  
17 range maps of individual species, which requires dense availability of occurrence data or relies on  
18 assumptions about the presence of species in unsampled areas deemed suitable by environmental  
19 niche models. Here we present a deep learning approach that directly estimates species richness,  
20 skipping the step of estimating individual species ranges. We train a neural network model based on  
21 species lists from inventory plots, which provide ground truthing for supervised machine learning.  
22 The model learns to predict species richness based on spatially associated variables, including  
23 climatic and geographic predictors, as well as counts of available species records from online  
24 databases. We assess the empirical utility of our approach by producing independently verifiable  
25 maps of alpha, beta and gamma plant diversity at high spatial resolutions for Australia, a continent  
26 with highly contrasting diversity patterns. Our deep learning framework provides a powerful and  
27 flexible new approach for estimating biodiversity patterns.

28

## 29 **1 Introduction**

30 Since the very beginnings of biogeographic research, the estimation and extrapolation of species  
31 diversity has been of foremost interest (Humboldt, 1817; Arrhenius, 1921). It is well established that  
32 species diversity is distributed unevenly across space, generally following a latitudinal gradient, with  
33 increasing diversity from the poles toward the equator (MacArthur, 1965). On a regional level, it has  
34 been found that there are substantial differences in species richness among habitats, such as between  
35 a forested area and an open grassland (MacArthur, 1965). These observed spatial patterns have led to  
36 the formulation of three levels of species diversity: alpha, beta, and gamma diversity (Whittaker,  
37 1960).

38 Alpha diversity (Whittaker, 1960) refers to diversity on a local scale, describing the species diversity  
39 (richness) within a functional community. For example, alpha diversity describes the observed  
40 species diversity within a defined plot or within a defined ecological unit, such as a pond, a field, or a  
41 patch of forest. The scale of such ecological units depends on the organism group of interest; while  
42 for birds a defined forest or grassland transect of several hundred m<sup>2</sup> to several km<sup>2</sup> may be  
43 appropriate to describe a species community, for insects this could be a single tree. For plants, alpha  
44 diversity is often equated to the count of species identified during the inventory of a vegetation plot  
45 of defined size (Revermann et al., 2016).

46 Beta diversity, on the other hand, describes the amount of differentiation between species  
47 communities (Whittaker, 1960). Unlike the other levels of species diversity, the exact interpretation  
48 and quantification of beta diversity varies significantly across studies (see Tuomisto, 2010a, 2010b  
49 for a detailed review on this topic). Originally, beta diversity was defined as the ratio between  
50 gamma and alpha diversity ( $\beta = \gamma/\alpha$ , sensu Whittaker, 1972). Today, one of the more commonly  
51 used measures of beta diversity is the Sørensen dissimilarity index (see Methods below for more  
52 detail), which captures spatial turnover as well as differences in diversity between sites (Koleff et al.,  
53 2003).

54 Gamma diversity describes the overall species diversity across communities within a larger  
55 geographic area (Whittaker, 1960). It is often summarized across biogeographic or political units,  
56 such as ecoregions or countries (Kier et al., 2005; Brummitt et al., 2021). Alternatively, studies  
57 commonly summarize gamma diversity within cells of a spatial grid of fixed cell-size (Goldie et al.,  
58 2010; Thornhill et al., 2016). While alpha diversity represents the actual species diversity that can be  
59 measured at a given site, gamma diversity more broadly and loosely describes the diversity of species  
60 that can be found in the whole area. Gamma diversity is the most communicated level of species  
61 diversity when referring to biodiversity hotspots, with tropical regions, in particular the Neotropics,  
62 showing the globally highest gamma diversity values (Raven et al., 2020). Alpha diversity, on the  
63 other hand, shows different areas of maximum diversity, dependent on the size of the area surveyed,  
64 with temperate grasslands showing among the highest species richness on small plots (Wilson et al.,  
65 2012).

66 While alpha diversity can be directly counted for small plot sizes, for example during species  
67 inventories, this requires much effort and thus cannot be scaled up to large areas or whole continents.  
68 Therefore, many studies apply some form of modeling and estimation to derive diversity maps for  
69 larger areas. For example, gamma diversity is often inferred by modelling individual species  
70 distributions and adding these up to derive the total number of species that occur in a given area  
71 (Mutke and Barthlott, 2005; Barthlott et al., 2007). However, this approach has been shown to  
72 introduce substantial errors, when cross-checking the diversity predictions with actual species counts

73 in selected grid cells (Aranda and Lobo, 2011). A general shortcoming of these methods is that  
74 usually there is not sufficient data available to reliably model the individual ranges for each species.  
75 This problem intensifies with the size of the target group for which to estimate diversity patterns. In  
76 some cases, total species diversity is extrapolated for larger groups, based on a selected subset of taxa  
77 with good data coverage, under the simplistic assumption that the diversity patterns revealed by these  
78 taxa are representative for others (Kier et al., 2005), which is however often not the case (Ritter et al.,  
79 2019).

80 Alternative approaches have been applied to the task of diversity estimation and mapping, which skip  
81 the step of modelling individual species ranges. These often involve using occurrence records, floras,  
82 and checklists for large biogeographic regions (Mutke and Barthlott, 2005; Kreft and Jetz, 2007).  
83 While such approaches do not require to model distributions of individual species, they are  
84 particularly vulnerable to biases in data collection, as some taxa may be better represented in some  
85 checklists and biodiversity repositories than others. When models are applied, they usually assume a  
86 single diversity value within each of the regions analyzed, without accounting for fine-scale local  
87 fluctuations within these (sometimes large) areas. Although it may be possible to interpolate diversity  
88 values to a finer resolution using spatial autocorrelation of associated variables such as climatic  
89 predictors (Kreft and Jetz, 2007), such gap filling may be difficult to verify and often provides a false  
90 sense of confidence for data-poor regions.

91 With the increasing availability of continental and global vegetation plot databases (Chytrý et al.,  
92 2016; Bruelheide et al., 2019; Sabatini et al., 2021), a new data source with extended spatial coverage  
93 has become widely available for the task of large-scale diversity estimation. Recently, Večeřa et al.  
94 (2019) showed the potential of machine learning models (random forest models) to estimate the  
95 expected diversity for fixed size vegetation plots (alpha diversity), based on climatic and other  
96 predictors, when trained on alpha diversity data from vegetation plot databases. However, to our  
97 knowledge, available machine learning models cannot extrapolate vegetation plot data to larger areas  
98 and do not provide estimates of multiple metrics of biodiversity.

99 Here we present a deep learning framework that uses neural network models (deep learning) to  
100 predict alpha, beta, and gamma diversity. Our approach requires neither geographic data of individual  
101 species, nor the manual extrapolation of species richness using methods such as species–area curves  
102 (Kier et al., 2005). Instead, our models inherently learn the species-area relationships, allowing  
103 prediction of the three diversity metrics at user-defined spatial scales. The models learn to predict  
104 plant diversity based on climatic and geographic predictors, measures of human impact, and  
105 sampling effort.

106 We selected plot-based vegetation survey data from Australia (vascular plants; Tracheophyta) to  
107 empirically test the effectiveness of these neural network models to predict diversity patterns and  
108 validate our methodology. Australia, as an island continent, has the advantage of a clear delimitation  
109 of natural boundaries; it has high natural diversity and uneven biological sampling (González-Orozco  
110 et al., 2014; Cook et al., 2015; Laffan et al., 2016); high spatial heterogeneity with well-defined and  
111 contrasting biomes (Byrne et al., 2008, 2011; Macintyre and Mucina, 2021); a relatively well-  
112 documented vascular flora with reliable national databases (<https://avh.chah.org.au/>; Sparrow et al.,  
113 2021) that feed into the Global Biodiversity Information Facility (GBIF, [gbif.org](http://gbif.org)); good climatic data  
114 (<http://www.bom.gov.au/climate/data/>); and a large number of freely available plot-based vegetation  
115 records suitable for training deep learning frameworks (Sabatini et al., 2021).

116

## 117 2 Methods

### 118 2.1 Vegetation plot data

119 The values of alpha, beta, and gamma diversity used in this study to train the neural network models  
120 were derived from vegetation plot data (species inventories). We downloaded these data from the  
121 sPlotOpen database (Sabatini et al., 2021), only using plots where all vascular plants had been  
122 assessed. This resulted in a total of 7,896 vegetation plots for Australia (Fig. 1). For each vegetation  
123 plot, we compiled its area (in m<sup>2</sup>) and the list of species identified. From each of these sites we  
124 compiled measures for alpha, beta, and gamma diversity as described in more detail below (Fig. 1),  
125 which we used to train our models.

126 Calculating gamma diversity required the definition of a surrounding area, preferably containing  
127 other vegetation plots, to determine the overall diversity found within the cumulative species lists of  
128 several neighboring vegetation plots (Fig. 2). To ensure that the same number of vegetation plots was  
129 used for calculating the gamma diversity of each site, we defined as the surrounding area a circle  
130 around each site encompassing exactly the  $N$  nearest neighbors (vegetation plots). The gamma  
131 diversity for each site was then determined as the number of unique species extracted from the  
132 species lists of the  $N$  nearest neighbors within the encompassing circle. After compiling diversity  
133 estimated for different values of  $N$  (Supplementary Figs. S1-S7), we chose an  $N$  of 50 for all models  
134 in this study, as this value led to the best compromise between a visually discernible spatial structure  
135 in the resulting beta and gamma diversity values, while also highlighting regional heterogeneity  
136 (Supplementary Fig. S3).

137 The radius of this encompassing circle varied between sites, depending on the proximity of other  
138 vegetation plots relative to the given site. This radius was used as a feature in our models, allowing  
139 the neural network to learn the expected associations between gamma diversity and the size of the  
140 area for which it was calculated (the species-area curve), which we used later when making  
141 predictions with this model to adjust the spatial resolution of the predictions.

142 Finally, beta diversity was calculated using the multiple-site implementation of the Sørensen  
143 dissimilarity index ( $\beta_{sor}$ ), following the definition in (Baselga, 2010). For a given focal site  $j$  with  $N$   
144 neighbors, we defined the focal site index as  $j=N+1$ . We iterated through the  $N$  neighboring sites ( $i$ )  
145 and applied the formula:

$$\frac{A + B}{2 \times \left[ \sum_i (S_i) - S_T \right] + A + B}$$

146 with

$$A = \sum_{i < j} \min(b_{ij}, b_{ji}) \text{ and } B = \sum_{i < j} \max(b_{ij}, b_{ji})$$

147 where  $b_{ij}$  and  $b_{ji}$  are the number of species only present in site  $i$  and site  $j$ , respectively,  $S_i$  is the total  
148 number of species in site  $i$  (alpha diversity from vegetation plot), and  $S_T$  is the total number of  
149 species in all sites combined (gamma diversity).  
150  
151

152

153

## 154 **2.2 Feature generation**

155 The alpha, beta, and gamma diversity metrics described above were used as labels to train three  
156 models based on a range of different features, one for each diversity metric. To ensure approximately  
157 equal size of all grid cells for the raster-based data used in this study, we transformed all spatial data  
158 into the cylindrical equal-area (CEA) projection, centered at 30 degrees latitude south of the equator.

159 As a general measure of sampling effort, we compiled the number of recorded species occurrences,  
160 available on GBIF which were found in the vicinity of a given site. We first downloaded all non-  
161 fossil vascular plant (Tracheophyta) occurrences for Australia from GBIF based on human  
162 observations and not flagged for geospatial issues (<https://doi.org/10.15468/dl.kbq3d7>). This includes  
163 both native and naturalized species, the latter having uneven spatial distributions related to broad  
164 disturbance histories in Australia (Leishman et al., 2017). This resulted in 13,580,191 occurrence  
165 records. We then discarded any records with non-binomial species names and cross-checked names  
166 of the remaining records against the World Checklist of Vascular Plants, a continuously updated  
167 collection of reviewed plant species names (Govaerts et al., 2021). This resulted in 12,622,786  
168 remaining GBIF records. For each site, we defined a 10×10 km window centered on the site's  
169 coordinates; we then counted all GBIF occurrences within this window as a measure of sampling  
170 effort (Supplementary Fig. S8), as well as the number of species found in the GBIF records as a  
171 diversity proxy. Both counts were used as individual features in our models.

172 We also compiled climatic and anthropogenic features for each site. First, we downloaded raster data  
173 for 19 bioclimatic variables (BIO1-BIO19) as well as data on elevation from the WorldClim database  
174 ([worldclim.org](http://worldclim.org), Fick and Hijmans, 2017). Second, we downloaded raster data on human footprint  
175 from [wchumanfootprint.org](http://wchumanfootprint.org) (Venter et al., 2016), which reflects the magnitude of human  
176 disturbance, including information on human population density, agricultural land use, presence of  
177 roads and several other data sources. There is a high coincidence between population density,  
178 agricultural development, and high biodiversity regions in Australia (Keith and Auld, 2017). All data  
179 rasters were downloaded at a resolution of 0.5 minutes of a degree (~1×1 km grid). The complete list  
180 of features (n=27) extracted for each site is shown in Table 1. All feature values were rescaled to  
181 range between 0 and 1 before being used as input in the neural network.

## 182 **2.3 Neural network architecture**

183 We built regression models using fully connected neural networks to learn and then infer species  
184 diversity based on the climatic, geographic, and human footprint features described above. While the  
185 values that can be used to train an NN regression model can theoretically take any range, it generally  
186 helps the model to converge when rescaling these values to a smaller range, approximately ranging  
187 between 0 to 1. We therefore rescaled our training labels by dividing the diversity values by the  
188 following scaling divisors, which were approximated to match the maximum values found in the  
189 training data for each diversity metric: alpha scaling divisor = 100, beta scaling divisor = 1, gamma  
190 scaling divisor = 800.

191 Models differed in their number of hidden layers and number of nodes per layer (see model testing  
192 below, Table 2). Further, we applied different fractions of dropout in our models, which leads to  
193 randomly “dropping” the specified fraction of nodes in each hidden layer in each training epoch. This  
194 has the effect of reducing overfitting towards the training data, as the model is forced to rely less on  
195 individual highly optimized weights. We used the rectified linear units function (ReLU) as the  
196 activation function within each layer, and a softplus activation function for the output layer. The

197 softplus activation function in the output layer ensures that the output values (diversity estimates) are  
198 all within a positive range, while not imposing any restrictions on the possible maximum value.

199 During training, the network was set to optimize for minimum mean absolute error (MAE) between  
200 the (rescaled) true diversity values and the network predictions. Of the 7,896 training instances  
201 (vegetation plot sites), we set aside 20% (1,579 instances) as an independent test set. We assigned  
202 another 20% (1,579 instances) of the data as a validation set, which we used to determine the optimal  
203 number of training epochs that minimizes the validation set MAE, while preventing overfitting  
204 towards the training data. All models were trained with the remaining 60% of the data (4,738  
205 instances), using a batch size of 40 instances.

## 206 **2.4 Model testing and evaluation**

207 We tested a range of different training configurations for each diversity metric, specifically testing  
208 different combinations of input features, different numbers of hidden layers and nodes per layer, and  
209 different dropout fractions (Table 2). Based on the diversity predictions for our independent test set,  
210 we calculated the mean absolute percentage error (MAPE) for each model, which differs from the  
211 MAE in being a relative error, scaled by the absolute values of the predictions. For each diversity  
212 metric we determined the best model configuration by picking the model with the lowest MAPE  
213 score.

214 After identifying the most suitable settings through model testing, we retrained this best model for  
215 each diversity metric, using all 7,896 training instances. To avoid overfitting towards the training  
216 data, we trained these production models only until the optimal epoch determined during model  
217 testing. For each diversity metric we trained an ensemble of 50 models with different random starting  
218 seeds, using the best model settings. We averaged the predictions across all these 50 models for each  
219 diversity metric, and also calculated the coefficient of variation (standard deviation divided by mean)  
220 as a measure of variation of the predicted diversity values, representing uncertainty.

## 221 **2.5 Prediction data**

222 To produce the predictions of alpha, beta, and gamma diversity across Australia we defined a grid  
223 with a cell size of 10×10 km and extracted the 27 features for each of the cell centroids. We set the  
224 plotsize feature for all points to 500 m<sup>2</sup> (most common vegetation plot size in training data,  
225 Supplementary Fig. S9). Therefore, the predicted alpha diversity values reflect the expected number  
226 of plant species to be found in a plot of size 500 m<sup>2</sup>. The radius feature, describing the size of the  
227 surrounding area around a point for which gamma diversity is estimated, was set to 5 km, to  
228 approximately match the size of the grid cells (10×10 km square).

229 By adjusting the radius feature, our trained models can be used to predict beta and gamma diversity  
230 at user-defined spatial resolutions, as it can be adapted to match the given cell size. Similarly,  
231 adjusting the plot size feature allows us to predict alpha diversity for any given plot size. This enables  
232 great flexibility in predicting species diversity at different spatial resolutions of the prediction grid,  
233 while inherently accounting for species-area relationships, as these are learned by the model. For  
234 both, the radius feature as well as the plot size feature, the selected values for prediction should be  
235 chosen to be within the range of values present in the training data (Supplementary Fig. S9).

236

237

### 238 3 Results

239 An overview of all tested models is shown in Table 2. The same model configuration was identified  
240 as the best model for beta and gamma diversity: all 27 features, 3 layers with 30, 15, and 5 nodes,  
241 respectively, and no dropout (dropout rate = 0). For alpha diversity, on the other hand, we identified  
242 as the best model the following configuration: 8 features (see Table 1), 2 layers with 30, and 5 nodes,  
243 and a dropout rate of 0.1. We identified the following training epochs as the stopping points for  
244 model training, as they constituted the best compromise between optimal model training and  
245 avoiding overfitting towards the training set (rounded to the nearest 50): 1500 epochs (alpha), 750  
246 epochs (beta), and 1700 epochs (gamma, see Supplementary Fig. S10). We used these numbers of  
247 training epochs for training of the 50 productions models for each diversity metric.

248 The best alpha diversity model predicted the test set, consisting of approximately 1,600 vegetation  
249 plots, with a mean absolute percentage error (MAPE) of 58.72% (Fig. 3). This means that the  
250 predicted diversity for the average test set instance was within an approximately 60% range of the  
251 true diversity value. This comparably high prediction error is likely caused by the fact that the alpha  
252 diversity training instances show a complex spatial pattern, with no easily discernible areas of high or  
253 low diversity (Fig. 1). The fact that most of the training features are spatially autocorrelated (such as  
254 the BioClim climatic layers) makes it difficult for the model to deduct any meaningful signal from  
255 these features during training for predicting alpha diversity. The predictions made by an ensemble of  
256 50 trained alpha models show comparably large uncertainties in some areas (Fig. 4), with a median  
257 coefficient of variation across all cells of 0.30. The areas of highest uncertainty – exceeding the  
258 median value – are located mostly in the western half of Australia (grey areas in Fig. 4), presumably  
259 due to the limited training data from those regions (Fig. 1).

260 The overall highest alpha diversity predictions are found along the eastern coast of Australia, from  
261 the northernmost tip of Queensland to the most southwestern part of Victoria (Fig. 4). A potential  
262 drop in alpha diversity is visible in the area around Cairns, extending about 100 km south from the  
263 city area, perhaps corresponding with the Burdekin-Lynd gap (Edwards et al., 2017), yet these grid  
264 cells are predicted with comparably high uncertainty, giving only weak support for this observed  
265 pattern. Other areas of medium to high alpha diversity inferred by our model are the top end of the  
266 Northern Territory, as well as the north Kimberley in northern Western Australia.

267 The best beta diversity model showed an MAPE score of 7.21%, constituting a substantially higher  
268 accuracy compared to the alpha diversity model. Similarly, the median coefficient of variation across  
269 all prediction grid cells was very low with 0.09, indicating high consistency in the predicted diversity  
270 pattern. The high-uncertainty cells, identified as having a coefficient of variation above the median,  
271 largely overlap with those identified for the alpha diversity model, covering the majority of Western  
272 Australia (Fig. 4). Perhaps being the least intuitive of the three diversity metrics, areas with a high  
273 predicted beta diversity within our framework represent sites that are expected to show large  
274 differences in species composition between vegetation plots within the defined area (a given grid  
275 cell).

276 Differently to alpha diversity, the majority of the eastern coastal areas show medium to low beta  
277 diversity values. Higher beta diversity is inferred for the southeastern part of Australia, particularly in  
278 higher elevations between Canberra and Melbourne. High species turnover is also inferred for the  
279 arid eastern desert of central Australia, as well as for south-western Australia.

280 With a MAPE score of only 6.09%, our gamma model performed the best out of the three different  
281 diversity metrics prediction models. The median coefficient of variation of gamma predictions across  
282 all of Australia was quantified at 0.37. As for the other two models, this variation was largely driven  
283 by high uncertainty grid cells in the western half of the continent (Fig. 4). Below we discuss the  
284 specific spatial diversity patterns present that were predicted by our models in more detail (see  
285 Discussion).

286 When evaluating our model predictions on a per-biome basis, excluding high uncertainty predictions  
287 as identified in Fig. 4, we identify differences in predicted diversity between biome types (Fig. 5).  
288 For alpha and gamma diversity, we find the highest average diversity predictions for tropical forests,  
289 temperate forests, montane shrublands and grasslands, and tropical and subtropical grasslands and  
290 savannas. Our beta diversity estimates, on the other hand, show a rather uniform pattern across  
291 biomes, with the exception of montane grasslands and shrublands, which show the highest species  
292 turnover. The high beta diversity identified for the montane biome may be driven by the increased  
293 elevational gradients in this area, as species turnover has been found to be higher along elevational  
294 gradients (Venn et al., 2017; Albrecht et al., 2021).

## 295 **4 Discussion**

### 296 **4.1 Using neural networks for diversity predictions**

297 Here we developed and applied a novel approach of estimating species diversity, using neural  
298 networks. We showcased our model, using vegetation plot data that is openly available through the  
299 sPlotOpen database for Australia, and showed that it can be used to accurately predict diversity on  
300 different scales (alpha, beta, and gamma) for any given point in Australia. This enables us to produce  
301 maps of species diversity at a wide range of spatial resolutions. The novelty of our approach, as  
302 compared to previous approaches of modelling species diversity, is that i) it does not require the  
303 modelling of distribution ranges for individual species (Mutke and Barthlott, 2005; Barthlott et al.,  
304 2007), ii) it does not require an *a priori* definition of species-area relationships (Kier et al., 2005), iii)  
305 it does not require the assumption of monotonic and usually oversimplifying relationships (e.g. linear  
306 or exponential) between predictors and response variable (Cingolani et al., 2010), and iv) it allows  
307 the direct quantification of uncertainty in the predictions.

308 Given these advantages, and the easy combination of different features of continuous or categorical  
309 nature, our deep learning model, represents a promising new tool for the task of predicting diversity.  
310 This study and other recent work (e.g., Večeřa et al., 2019) demonstrate how such models can be  
311 trained on readily available data from public databases. The accuracy of these models could be  
312 potentially further improved by compiling additional features deemed to be informative for the task  
313 of diversity prediction. Preferably such features should be based on data available in form of a spatial  
314 grids covering the entirety of the prediction area (in this case, Australia). Remote sensing data are a  
315 promising and potentially highly informative data source to fill up spatial gaps with increasingly  
316 detailed vegetation maps (Gholizadeh et al., 2020; Moat et al., 2021), and could be applied in future  
317 machine learning models for the task of diversity prediction.

### 318 **4.2 Correlation between diversity metrics**

319 Previous studies have found all three diversity metrics to be correlated (Cingolani et al., 2010). Here  
320 we find that the maps produced for alpha and for gamma diversity overall show similar diversity  
321 hotspots, while beta diversity shows a different spatial pattern (Figs. 4 and 5). There is a wide variety  
322 of definitions of beta diversity, some which are directly correlated to alpha and gamma diversity



323 (e.g., Whittaker's original definition of  $\beta = \gamma/\alpha$ , sensu Whittaker, 1960). However, the Sørensen  
324 dissimilarity index  $\beta_{sor}$  used in this study does not display such a direct correlation to either alpha or  
325 gamma diversity, leading to the distinctly different spatial pattern observed in our predictions, which  
326 reflects the different patterns between this metric and the other two also observed in the training data  
327 (Fig. 1).

328 While the patterns of alpha and gamma diversity inferred by our models are strongly correlated, they  
329 do differ in some areas. There is potential for areas with low gamma diversity to exhibit relatively  
330 high densities of species, leading to high alpha diversity estimates within smaller defined areas, such  
331 as the 500 m<sup>2</sup> vegetation plots predicted by our models. This is particularly the case for vegetation  
332 types consisting of species with relatively small individual plant sizes (such as grasslands and  
333 shrublands), which in comparison with forests allow for a potentially denser accumulation of  
334 individuals. These differences in average plant size often lead to open habitat grasslands displaying  
335 comparatively high alpha diversity values, particularly on small plot sizes (Wilson et al., 2012).

### 336 **4.3 Spatial biases in training data**

337 Sampling biases pose a severe challenge for biodiversity reconstruction in countries of uneven spatial  
338 sampling, such as Australia (Piccolo et al., 2020). In our approach, we account for geographic bias in  
339 the training data by quantifying the uncertainty in the diversity predictions, which largely reflect  
340 those areas with little or no training instances. Additionally, we add the count of GBIF occurrence  
341 records in the surrounding of any given training instance as a measure of general sampling effort.  
342 Recent studies have addressed the issue of differences in sampling effort in more detail for defined  
343 regions and have pointed a way forward in addressing and accounting for this issue, using  
344 strategically sampled empirical data (Gioia and Hopper, 2017). However, such efforts are labor- and  
345 time-intensive and may not be feasible on continental scales. Alternatively, computational tools that  
346 can readily quantify spatial biases based on public database data are a promising way forward  
347 towards better accounting for the issue of spatial sampling biases (Zizka et al., 2021).

### 348 **4.4 Predicted diversity patterns for Australia**

349 Our model predictions of alpha and gamma diversity identify several vascular plant biodiversity  
350 hotspots for Australia, such as i) the tropical and subtropical forests in northeastern Queensland, ii)  
351 the temperate forests and the montane grasslands and shrublands of southeastern Australia, iii) the  
352 tropical savanna dominated ecosystems of the Northern Territory, and iv) northern Western Australia  
353 (Figs. 4 and 5). These areas of high vascular plant diversity largely correlate with findings of  
354 previous studies, e.g. (Steffen, 2009; Goldie et al., 2010; Yeates et al., 2014; Thornhill et al., 2016)  
355 and are highly correlated with broader climatic patterns (Ooi et al., 2017).

356 One notable difference of our model predictions compared to previous work is the south-west of  
357 Western Australia, which is often inferred as a plant diversity hotspot (e.g. Myers et al., 2000;  
358 Steffen, 2009), but was predicted with comparably low alpha and gamma diversity by our models.  
359 This south-west Australian biodiversity hotspot may not have been predicted accurately – as also  
360 indicated by the large prediction uncertainty identified by our model – due to alternate evolutionary  
361 patterns in the region that have led to higher diversity than might otherwise be predicted in this very  
362 old and climatically buffered, infertile landscape (an OCBIL; see Hopper et al., 2016). It is also  
363 interesting to note that the models predict similar alpha diversity between the Kimberley region of  
364 Western Australia and the top end of the Northern Territory, as recent surveys demonstrate that this is  
365 indeed the case (R.L. Barrett & M.D. Barrett, unpubl. data).

366 Interestingly, our beta diversity model inferred high species turnover for the arid eastern desert of  
367 central Australia. While this region has the lowest estimates for alpha and gamma diversity, the  
368 species turnover (relative to the total diversity) is inferred to be among the highest on the continent,  
369 likely reflecting a complex mosaic of Mediterranean, temperate and arid vegetation types in this  
370 region (Fox, 2007).

## 371 **5 Conflict of Interest**

372 The authors declare that the research was conducted in the absence of any commercial or financial  
373 relationships that could be construed as a potential conflict of interest.

## 374 **6 Author Contributions**

375 TA, AA, and DS contributed to conception and design of the study. TA compiled the data, wrote the  
376 code, and ran all analyses. TA wrote the first draft of the manuscript, with contributions of sections  
377 written by AA, RB, and DS. All authors contributed to manuscript revision, read, and approved the  
378 submitted version.

## 379 **7 Funding**

380 TA and DS acknowledge funding from the Swedish Research Council (2019-04739). AA  
381 acknowledges financial support from the Swedish Research Council (2019-05191), the Swedish  
382 Foundation for Strategic Research (FFL15-0196) and the Royal Botanic Gardens, Kew. DS also  
383 received funding from the Swiss National Science Foundation (PCEFP3\_187012). All computations  
384 were carried out on the Kebnekaise computing cluster, as part of the High Performance Computing  
385 Center North (HPC2N), which is funded by the Swedish National Infrastructure for Computing  
386 (SNIC), as well as the Kempe Foundations and the Knut and Alice Wallenberg Foundation.

## 387 **8 Acknowledgments**

388 We thank the members of the Gothenburg Global Biodiversity Centre (GGBC) for valuable feedback  
389 during the early stages of this project, in particular Søren Faurby.

## 390 **9 Supplementary Material**

391 The supplementary material accompanying this study contains Supplementary Figures S1-S13.

## 392 **10 Data Availability Statement**

393 Publicly available datasets were analyzed in this study. These data can be found  
394 here: <https://doi.org/10.5281/zenodo.5792187>. All code developed here (Python and R scripts) will  
395 be made available here: [https://github.com/tobiashofmann88/plant\\_div\\_NN](https://github.com/tobiashofmann88/plant_div_NN).

396

397 **11 Tables**

398 **Table 1:** Features used in the NN models.

| Index | Feature name                          | Data source             | Selected 27 | Selected 8 | Selected 6 |
|-------|---------------------------------------|-------------------------|-------------|------------|------------|
| 1     | Longitude                             | sPlotOpen               | X           | X          |            |
| 2     | Latitude                              | sPlotOpen               | X           | X          |            |
| 3     | Sampling effort                       | gbif.org                | X           |            |            |
| 4     | # of detected species                 | gbif.org                | X           |            |            |
| 5     | Human footprint                       | wcshumanfootprint.org   | X           | X          | X          |
| 6     | Elevation                             | WorldClim               | X           | X          | X          |
| 7     | BIO1 (Annual mean temperature)        | WorldClim               | X           | X          | X          |
| 8     | BIO2 (Mean diurnal range)             | WorldClim               | X           |            |            |
| 9     | BIO3 (Isothermality)                  | WorldClim               | X           |            |            |
| 10    | BIO4 (Temperature seasonality)        | WorldClim               | X           |            |            |
| 11    | BIO5 (Max. temp. warmest month)       | WorldClim               | X           |            |            |
| 12    | BIO6 (Min temp coldest month)         | WorldClim               | X           |            |            |
| 13    | BIO7 (Temperature annual range)       | WorldClim               | X           |            |            |
| 14    | BIO8 (Mean temp. wettest quarter)     | WorldClim               | X           |            |            |
| 15    | BIO9 (Mean temp. driest quarter)      | WorldClim               | X           |            |            |
| 16    | BIO10 (Mean temp. warmest quarter)    | WorldClim               | X           |            |            |
| 17    | BIO11 (Mean temp. coldest quarter)    | WorldClim               | X           |            |            |
| 18    | BIO12 (Annual precipitation)          | WorldClim               | X           | X          | X          |
| 19    | BIO13 (Precipitation wettest month)   | WorldClim               | X           |            |            |
| 20    | BIO14 (Precipitation driest month)    | WorldClim               | X           |            |            |
| 21    | BIO15 (Precipitation seasonality)     | WorldClim               | X           |            |            |
| 22    | BIO16 (Precipitation wettest quarter) | WorldClim               | X           |            |            |
| 23    | BIO17 (Precipitation driest quarter)  | WorldClim               | X           |            |            |
| 24    | BIO18 (Precipitation warmest quarter) | WorldClim               | X           |            |            |
| 25    | BIO19 (Precipitation coldest quarter) | WorldClim               | X           |            |            |
| 26    | Vegetation plot size                  | Based on sPlotOpen data | X           | X          | X          |
| 27    | Neighborhood radius                   | Based on sPlotOpen data | X           | X          | X          |

399

400

401 **Table 2:** Prediction accuracy for test set of all tested models. The last three columns show the mean  
 402 average percentage error (MAPE) of the model predictions for an independent test set. The tested  
 403 models differ in terms of the number of features (first column), number of layers and nodes per layer  
 404 (second column), and the dropout rate (third column). The best models for each diversity metric are  
 405 highlighted in bold. More detailed visualizations of the test set predictions for these best models are  
 406 shown in Fig. 4.

| Features | Nodes         | Dropout | Alpha         | Beta          | Gamma         |
|----------|---------------|---------|---------------|---------------|---------------|
| 6        | 30            | 0       | 0.6611        | 0.0750        | 0.1088        |
| 6        | 30            | 0.1     | 0.7078        | 0.0773        | 0.1409        |
| 6        | 30            | 0.3     | 0.7095        | 0.0779        | 0.1434        |
| 6        | 30, 5         | 0       | 0.6440        | 0.0752        | 0.1013        |
| 6        | 30, 5         | 0.1     | 0.6129        | 0.0761        | 0.1356        |
| 6        | 30, 5         | 0.3     | 0.7103        | 0.0788        | 0.1457        |
| 6        | 30, 15, 5     | 0       | 0.6570        | 0.0751        | 0.0823        |
| 6        | 30, 15, 5     | 0.1     | 0.6111        | 0.0752        | 0.0951        |
| 6        | 30, 15, 5     | 0.3     | 0.6725        | 0.0783        | 0.1312        |
| 6        | 30, 20, 10, 5 | 0       | 0.6225        | 0.0743        | 0.0804        |
| 6        | 30, 20, 10, 5 | 0.1     | 0.6542        | 0.0749        | 0.1012        |
| 6        | 30, 20, 10, 5 | 0.3     | 0.6844        | 0.0794        | 0.1307        |
| 8        | 30            | 0       | 0.6555        | 0.0742        | 0.1064        |
| 8        | 30            | 0.1     | 0.7022        | 0.0753        | 0.1056        |
| 8        | 30            | 0.3     | 0.6776        | 0.0763        | 0.1107        |
| 8        | 30, 5         | 0       | 0.6301        | 0.0749        | 0.0851        |
| 8        | 30, 5         | 0.1     | <b>0.5872</b> | 0.0757        | 0.1012        |
| 8        | 30, 5         | 0.3     | 0.6740        | 0.0779        | 0.1298        |
| 8        | 30, 15, 5     | 0       | 0.6179        | 0.0745        | 0.0673        |
| 8        | 30, 15, 5     | 0.1     | 0.6335        | 0.0749        | 0.0911        |
| 8        | 30, 15, 5     | 0.3     | 0.6606        | 0.0778        | 0.1173        |
| 8        | 30, 20, 10, 5 | 0       | 0.6157        | 0.0741        | 0.0634        |
| 8        | 30, 20, 10, 5 | 0.1     | 0.6047        | 0.0731        | 0.0877        |
| 8        | 30, 20, 10, 5 | 0.3     | 0.7323        | 0.0788        | 0.1357        |
| 27       | 30            | 0       | 0.6233        | 0.0732        | 0.0882        |
| 27       | 30            | 0.1     | 0.6198        | 0.0741        | 0.0829        |
| 27       | 30            | 0.3     | 0.6336        | 0.0750        | 0.0954        |
| 27       | 30, 5         | 0       | 0.6073        | 0.0738        | 0.0835        |
| 27       | 30, 5         | 0.1     | 0.5884        | 0.0736        | 0.0835        |
| 27       | 30, 5         | 0.3     | 0.6157        | 0.0764        | 0.1016        |
| 27       | 30, 15, 5     | 0       | 0.5921        | <b>0.0721</b> | <b>0.0609</b> |
| 27       | 30, 15, 5     | 0.1     | 0.6165        | 0.0747        | 0.0819        |
| 27       | 30, 15, 5     | 0.3     | 0.6343        | 0.0791        | 0.1145        |
| 27       | 30, 20, 10, 5 | 0       | 0.5904        | 0.0722        | 0.0660        |
| 27       | 30, 20, 10, 5 | 0.1     | 0.6153        | 0.0740        | 0.0987        |
| 27       | 30, 20, 10, 5 | 0.3     | 0.6824        | 0.0786        | 0.1221        |

407

408

409 12 Figures

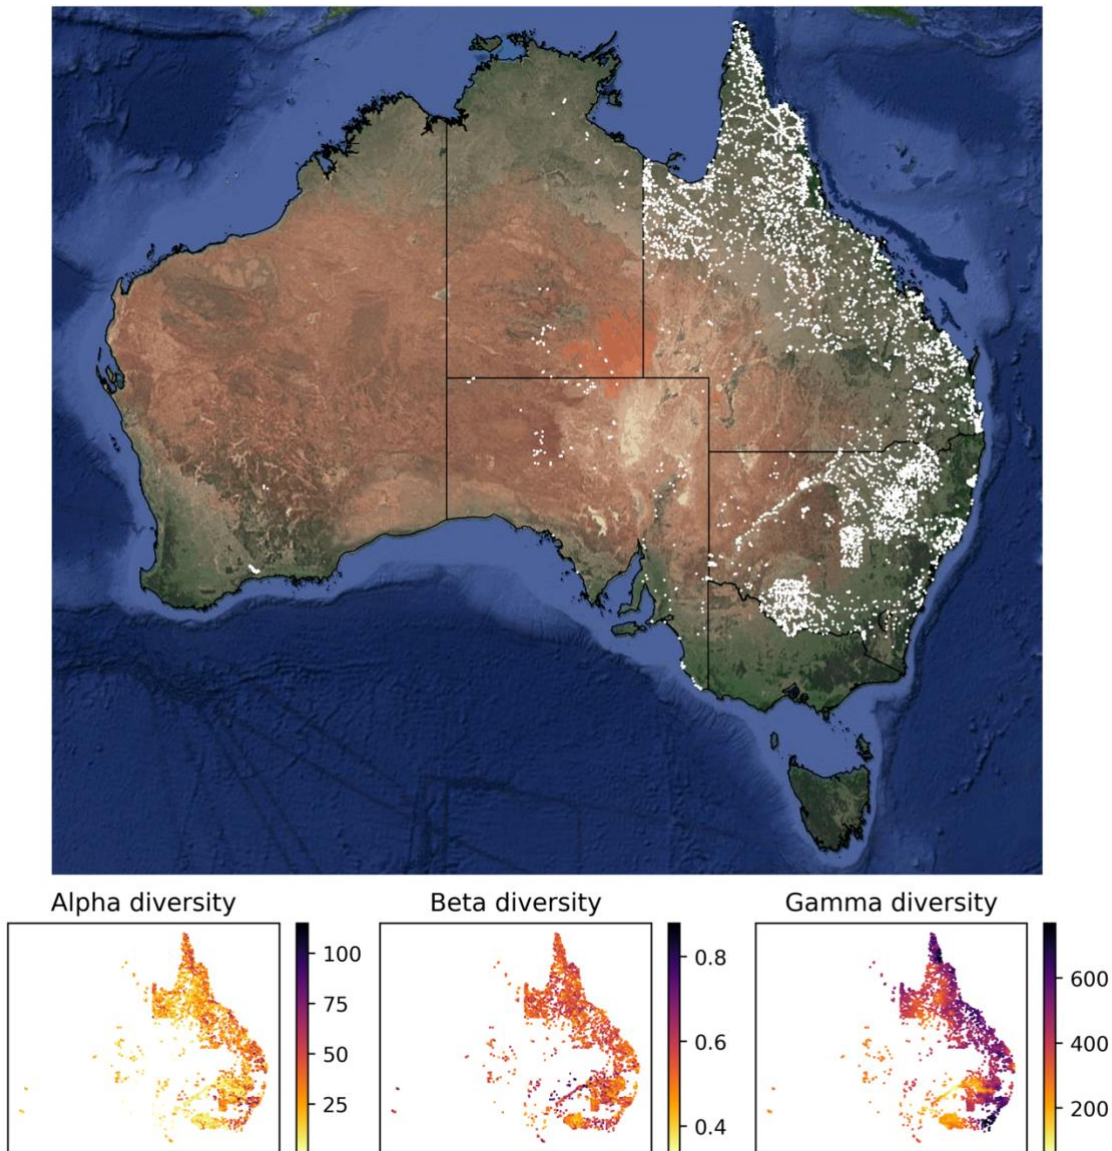

410  
411 **Figure 1:** Sites with vegetation plot data used in this study for model training and evaluation. Most  
412 of the vegetation plot sites used in this study (white points, 7,896 sites) are located in the easternmost  
413 two Australian states Queensland (northeast) and New South Wales (center east). Our uncertainty  
414 quantification (Fig. 4) addresses these spatial biases in the underlying data, showing higher  
415 prediction uncertainty in areas with low data coverage. The panels below the map show the compiled  
416 measure of alpha, beta, and gamma diversity for all vegetation plot sites. The satellite image of  
417 Australia was downloaded via ggmap (Kahle and Wickham, 2013).

418

419

**A) Find nearest neighbors and nearby occurrences**

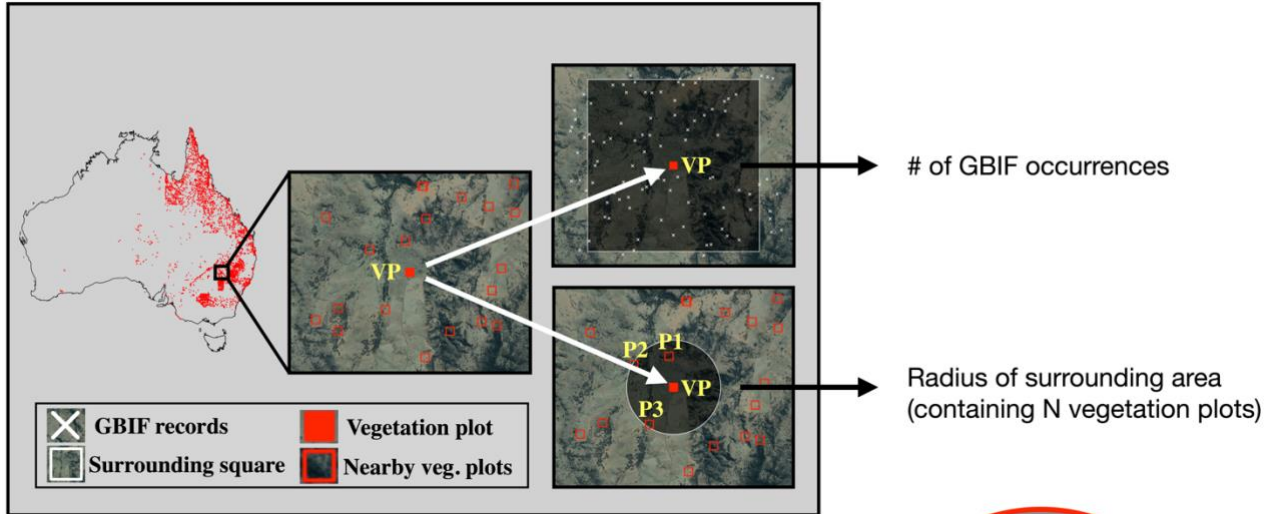

**B) Calculate diversity metrics based on species lists**

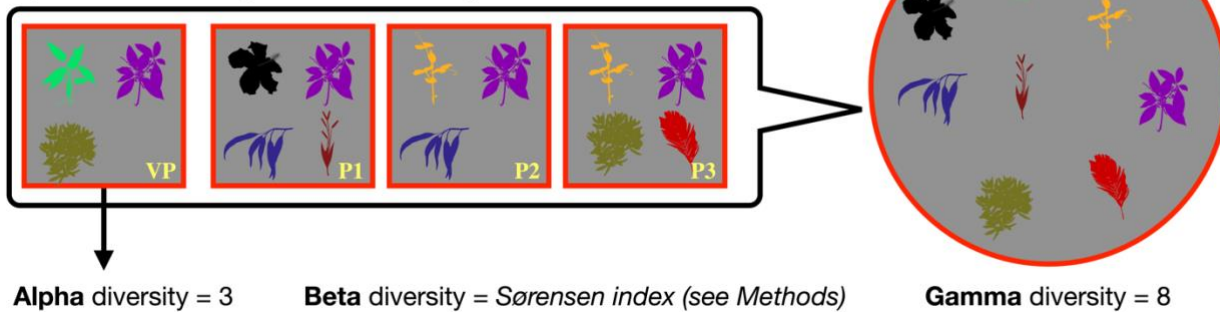

420

421

422

423

424

425

426

427

428

429

430

431

432

**Figure 2:** Calculation of diversity measures from vegetation plot data. For a given vegetation plot (VP, solid red square, panel A) we identified the N nearest neighboring vegetation plots in space (N=3 in this example, represented by plots P1-P3). We exported the radius of the smallest circle encompassing all N neighbors as a feature for model training. Additionally, we exported the number of GBIF occurrences within a square of 10×10 km size around the given vegetation plot, as a measure of sampling effort in the general area. Having identified the nearest neighbors (P1-P3), we compared the species lists of these vegetation plots with the focal vegetation plot (VP, panel B). Alpha diversity represents the number of species found in the focal vegetation plot (VP), while gamma diversity represents the total diversity consisting of all species identified among the focal and neighboring vegetation plots. Beta diversity was calculated using the multiple-site Sørensen dissimilarity index (see Methods), based on the differences in species composition found among the selected vegetation plots.

433

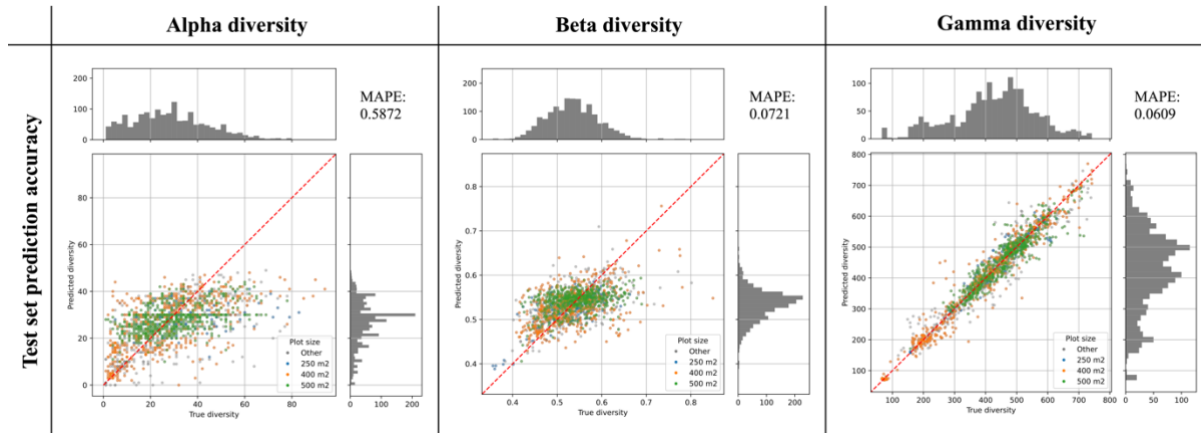

434  
435 **Figure 3:** Prediction accuracy of best models as determined on an independent test set. The scatter  
436 plots show the predicted diversity (y-axes) plotted against the true diversity (x-axes) for the best  
437 alpha, beta, and gamma diversity models. These estimates were made for a randomly selected and  
438 independent test set (N = 1,579 instances), exclusively consisting of instances that were not used  
439 during model training. The points are colored by the vegetation plot-size associated with each data  
440 point (see legend). The red diagonal line shows for reference the best-case scenario, if all labels were  
441 predicted 100% accurately. Histograms show the total distribution of values for the true diversity  
442 values (top) and the predicted diversity values (right). For each model we calculated the Mean  
443 Absolute Percentage Error (MAPE), shown in the top-right corner of each plot.

444

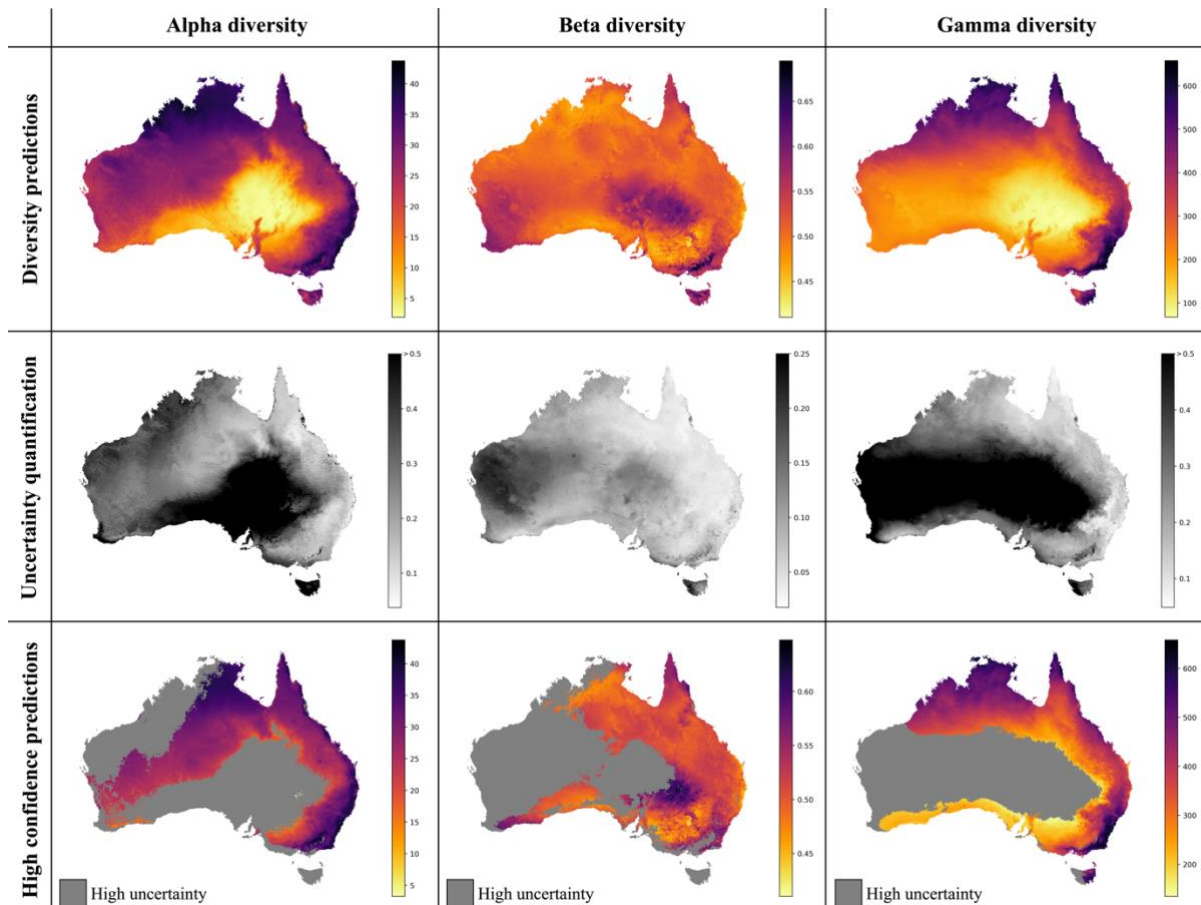

445  
446 **Figure 4:** Neural Network predictions for alpha, beta, and gamma diversity of vascular plants. The  
447 NN models were trained separately on alpha, beta, or gamma diversity estimates, which we compiled  
448 from vegetation plot data (Fig. 1). The alpha diversity maps (left) show the expected number of  
449 vascular plant species expected to be found in a 500 m<sup>2</sup> plot (most common plot-size found in the  
450 vegetation plot data, Supplementary Fig. S2). The beta diversity maps (center) quantifies the spatial  
451 turnover and differences in species compositions (Sørensen dissimilarity index, relative to the total  
452 diversity) between such 500 m<sup>2</sup> plots within each grid cell (10×10 km). The gamma diversity maps  
453 show the total species richness within each grid cell. The top row shows the predictions averaged  
454 across an ensemble of 50 independently trained models, using different starting seeds. The center row  
455 shows the coefficient of variation for each grid cell, as a measure of prediction uncertainty. High  
456 values (dark grey/black) correspond to grid cells with less consistent diversity predictions. The  
457 bottom row shows the average diversity predictions for only those grid cells with the most consistent  
458 diversity predictions (coefficient of variation smaller than median across all grid cells), while high-  
459 uncertainty grid cells are marked in grey.

460



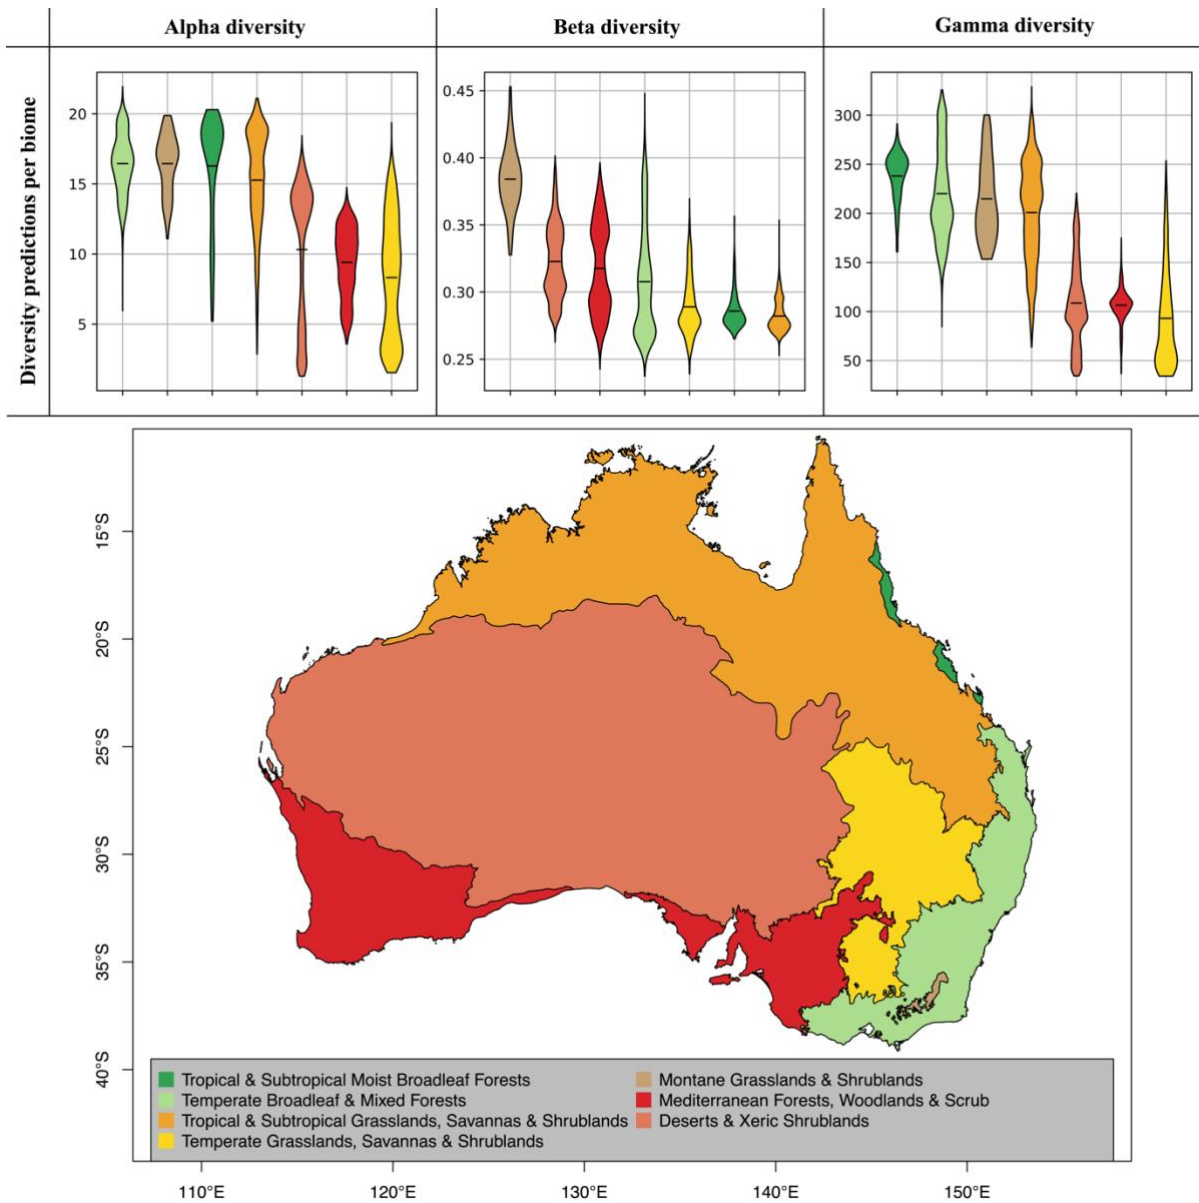

461  
462 **Figure 5:** Diversity predictions by biome. The violin plots show the range of diversity predictions  
463 across all grid cells within a given biome, excluding high uncertainty predictions (see. Fig. 4). The  
464 horizontal black lines inside the violin plots mark the mean estimate for each biome. The biomes,  
465 which are displayed on the map, were compiled from the Terrestrial Ecoregions of the World  
466 (TEOW) data (Olson et al., 2001).

467

468 **13 References**

- 469 Albrecht, J., Peters, M. K., Becker, J. N., Behler, C., Classen, A., Ensslin, A., et al. (2021). Species  
470 richness is more important for ecosystem functioning than species turnover along an  
471 elevational gradient. *Nat Ecol Evol*, 1–12. doi:10.1038/s41559-021-01550-9.
- 472 Aranda, S. C., and Lobo, J. M. (2011). How well does presence-only-based species distribution  
473 modelling predict assemblage diversity? A case study of the Tenerife flora. *Ecography* 34,  
474 31–38. doi:10.1111/j.1600-0587.2010.06134.x.
- 475 Arrhenius, O. (1921). Species and area. *Journal of Ecology* 9, 95–99.
- 476 Barthlott, W., Hostert, A., Kier, G., Küper, W., Kreft, H., Mutke, J., et al. (2007). Geographic  
477 patterns of vascular plant diversity at continental to global scales (Geographische Muster der  
478 Gefäßpflanzenvielfalt im kontinentalen und globalen Maßstab). *Erdkunde*, 305–315.
- 479 Baselga, A. (2010). Partitioning the turnover and nestedness components of beta diversity. *Global  
480 Ecology and Biogeography* 19, 134–143. doi:10.1111/j.1466-8238.2009.00490.x.
- 481 Bruelheide, H., Dengler, J., Jiménez-Alfaro, B., Purschke, O., Hennekens, S. M., Chytrý, M., et al.  
482 (2019). sPlot – A new tool for global vegetation analyses. *Journal of Vegetation Science* 30,  
483 161–186. doi:10.1111/jvs.12710.
- 484 Brummitt, N., Araújo, A. C., and Harris, T. (2021). Areas of plant diversity—What do we know?  
485 *PLANTS, PEOPLE, PLANET* 3, 33–44. doi:10.1002/ppp3.10110.
- 486 Byrne, M., Steane, D. A., Joseph, L., Yeates, D. K., Jordan, G. J., Crayn, D., et al. (2011). Decline of  
487 a biome: evolution, contraction, fragmentation, extinction and invasion of the Australian  
488 mesic zone biota. *Journal of Biogeography* 38, 1635–1656. doi:10.1111/j.1365-  
489 2699.2011.02535.x.
- 490 Byrne, M., Yeates, D. K., Joseph, L., Kearney, M., Bowler, J., Williams, M. A. J., et al. (2008). Birth  
491 of a biome: insights into the assembly and maintenance of the Australian arid zone biota.  
492 *Molecular ecology* 17, 4398.
- 493 Chytrý, M., Hennekens, S. M., Jiménez-Alfaro, B., Knollová, I., Dengler, J., Jansen, F., et al. (2016).  
494 European Vegetation Archive (EVA): an integrated database of European vegetation plots.  
495 *Applied Vegetation Science* 19, 173–180. doi:10.1111/avsc.12191.
- 496 Cingolani, A. M., Vaieretti, M. V., Gurvich, D. E., Giorgis, M. A., and Cabido, M. (2010). Predicting  
497 alpha, beta and gamma plant diversity from physiognomic and physical indicators as a tool  
498 for ecosystem monitoring. *Biological Conservation* 143, 2570–2577.  
499 doi:10.1016/j.biocon.2010.06.026.
- 500 Cook, L. G., Hardy, N. B., and Crisp, M. D. (2015). Three explanations for biodiversity hotspots:  
501 small range size, geographical overlap and time for species accumulation. An Australian case  
502 study. *New Phytologist* 207, 390–400. doi:10.1111/nph.13199.
- 503 Edwards, R. D., Crisp, M. D., Cook, D. H., and Cook, L. G. (2017). Congruent biogeographical  
504 disjunctions at a continent-wide scale: Quantifying and clarifying the role of biogeographic

- 505 barriers in the Australian tropics. *PLOS ONE* 12, e0174812.  
506 doi:10.1371/journal.pone.0174812.
- 507 Fick, S. E., and Hijmans, R. J. (2017). WorldClim 2: new 1-km spatial resolution climate surfaces for  
508 global land areas. *International Journal of Climatology* 37, 4302–4315. doi:10.1002/joc.5086.
- 509 Fox, A. (2007). *Wild habitats: a natural history of Australian ecosystems*. ABC books.
- 510 Gholizadeh, H., Gamon, J. A., Helzer, C. J., and Cavender-Bares, J. (2020). Multi-temporal  
511 assessment of grassland  $\alpha$ - and  $\beta$ -diversity using hyperspectral imaging. *Ecological*  
512 *Applications* 30, e02145. doi:10.1002/eap.2145.
- 513 Gioia, P., and Hopper, S. D. (2017). A new phytogeographic map for the Southwest Australian  
514 Floristic Region after an exceptional decade of collection and discovery. *Botanical Journal of*  
515 *the Linnean Society* 184, 1–15. doi:10.1093/botlinnean/box010.
- 516 Goldie, X., Gillman, L., Crisp, M., and Wright, S. (2010). Evolutionary speed limited by water in  
517 arid Australia. *Proc. R. Soc. B.* 277, 2645–2653. doi:10.1098/rspb.2010.0439.
- 518 González-Orozco, C. E., Ebach, M. C., Laffan, S., Thornhill, A. H., Knerr, N. J., Schmidt-Lebuhn, A.  
519 N., et al. (2014). Quantifying Phytogeographical Regions of Australia Using Geospatial  
520 Turnover in Species Composition. *PLOS ONE* 9, e92558. doi:10.1371/journal.pone.0092558.
- 521 Govaerts, R., Nic Lughadha, E., Black, N., Turner, R., and Paton, A. (2021). The World Checklist of  
522 Vascular Plants, a continuously updated resource for exploring global plant diversity. *Sci*  
523 *Data* 8, 215. doi:10.1038/s41597-021-00997-6.
- 524 Hopper, S. D., Silveira, F. A. O., and Fiedler, P. L. (2016). Biodiversity hotspots and Ocbil theory.  
525 *Plant Soil* 403, 167–216. doi:10.1007/s11104-015-2764-2.
- 526 Humboldt, A. von (1817). *De distributione geographica plantarum secundum coeli temperiem et*  
527 *altitudinem montium prolegomena*. In *libraria graeco-latino-germanica*.
- 528 Kahle, D., and Wickham, H. (2013). ggmap: Spatial Visualization with ggplot2. *The R Journal* 5,  
529 144. doi:10.32614/RJ-2013-014.
- 530 Keith, D. A., and Auld, T. D. (2017). “Conservation of Australian Vegetation,” in *Australian*  
531 *Vegetation* (Cambridge University Press), 677–710.
- 532 Kier, G., Mutke, J., Dinerstein, E., Ricketts, T. H., Küper, W., Kreft, H., et al. (2005). Global patterns  
533 of plant diversity and floristic knowledge. *Journal of Biogeography* 32, 1107–1116.  
534 doi:10.1111/j.1365-2699.2005.01272.x.
- 535 Koleff, P., Gaston, K. J., and Lennon, J. J. (2003). Measuring beta diversity for presence–absence  
536 data. *Journal of Animal Ecology* 72, 367–382. doi:10.1046/j.1365-2656.2003.00710.x.
- 537 Kreft, H., and Jetz, W. (2007). Global patterns and determinants of vascular plant diversity. *PNAS*  
538 104, 5925–5930. doi:10.1073/pnas.0608361104.
- 539 Laffan, S. W., Rosauer, D. F., Di Virgilio, G., Miller, J. T., González-Orozco, C. E., Knerr, N., et al.  
540 (2016). Range-weighted metrics of species and phylogenetic turnover can better resolve

- 541 biogeographic transition zones. *Methods in Ecology and Evolution* 7, 580–588.  
542 doi:10.1111/2041-210X.12513.
- 543 Leishman, M. R., Gallagher, R. V., Catford, J. A., Morgan, J. W., Grice, A. C., and Setterfield, S. A.  
544 (2017). “Invasive plants and pathogens in Australia,” in *Australian Vegetation* (Cambridge  
545 University Press), 207–229.
- 546 MacArthur, R. H. (1965). Patterns of Species Diversity. *Biological Reviews* 40, 510–533.  
547 doi:10.1111/j.1469-185X.1965.tb00815.x.
- 548 Macintyre, P. D., and Mucina, L. (2021). The biomes of Western Australia: a vegetation-based  
549 approach using the zonality/ azonality conceptual framework. *New Zealand Journal of Botany*  
550 0, 1–23. doi:10.1080/0028825X.2021.1890154.
- 551 Moat, J., Orellana-Garcia, A., Tovar, C., Arakaki, M., Arana, C., Cano, A., et al. (2021). Seeing  
552 through the clouds – Mapping desert fog oasis ecosystems using 20 years of MODIS imagery  
553 over Peru and Chile. *International Journal of Applied Earth Observation and Geoinformation*  
554 103, 102468. doi:10.1016/j.jag.2021.102468.
- 555 Mutke, J., and Barthlott, W. (2005). Patterns of vascular plant diversity at continental to global scale.  
556 *Biologische Skriften* 55, 521–537.
- 557 Myers, N., Mittermeier, R. A., Mittermeier, C. G., da Fonseca, G. A. B., and Kent, J. (2000).  
558 Biodiversity hotspots for conservation priorities. *Nature* 403, 853–858.  
559 doi:10.1038/35002501.
- 560 Olson, D. M., Dinerstein, E., Wikramanayake, E. D., Burgess, N. D., Powell, G. V. N., Underwood,  
561 E. C., et al. (2001). Terrestrial Ecoregions of the World: A New Map of Life on Earth.  
562 *BioScience* 51, 933–938. doi:10.1641/0006-3568(2001)051[0933:TEOTWA]2.0.CO;2.
- 563 Ooi, M. K. J., Auld, T., Beaumont, L., and Bradstock, R. (2017). “Climatic Influence over  
564 Vegetation Pattern and Process,” in *Australian Vegetation* (Cambridge University Press),  
565 182–206.
- 566 Piccolo, R. L., Warnken, J., Chauvenet, A. L. M., and Castley, J. G. (2020). Location biases in  
567 ecological research on Australian terrestrial reptiles. *Sci Rep* 10, 9691. doi:10.1038/s41598-  
568 020-66719-x.
- 569 Raven, P. H., Gereau, R. E., Phillipson, P. B., Chatelain, C., Jenkins, C. N., and Ulloa Ulloa, C.  
570 (2020). The distribution of biodiversity richness in the tropics. *Science Advances* 6, eabc6228.  
571 doi:10.1126/sciadv.abc6228.
- 572 Revermann, R., Finckh, M., Stellmes, M., Strohbach, B. J., Frantz, D., and Oldeland, J. (2016).  
573 Linking Land Surface Phenology and Vegetation-Plot Databases to Model Terrestrial Plant  $\alpha$ -  
574 Diversity of the Okavango Basin. *Remote Sensing* 8, 370. doi:10.3390/rs8050370.
- 575 Ritter, C. D., Häggqvist, S., Karlsson, D., Sääksjärvi, I. E., Muasya, A. M., Nilsson, R. H., et al.  
576 (2019). Biodiversity assessments in the 21st century: the potential of insect traps to  
577 complement environmental samples for estimating eukaryotic and prokaryotic diversity using  
578 high-throughput DNA metabarcoding. *Genome* 62, 147–159. doi:10.1139/gen-2018-0096.

- 579 Sabatini, F. M., Lenoir, J., Hattab, T., Arnst, E. A., Chytrý, M., Dengler, J., et al. (2021). sPlotOpen –  
580 An environmentally balanced, open-access, global dataset of vegetation plots. *Global Ecology*  
581 *and Biogeography* 30, 1740–1764. doi:10.1111/geb.13346.
- 582 Sparrow, B., Tokmakoff, A., Leitch, E., Guerin, G., O’Neill, S., Macdonald, C., et al. (2021). TERN  
583 Surveillance monitoring program: Plant occurrence. Version 1.0.0. Terrestrial Ecosystem  
584 Research Network (TERN). (Dataset). Available at: [https://portal.tern.org.au/tern-](https://portal.tern.org.au/tern-surveillance-monitoring-plant-occurrence/23235)  
585 [surveillance-monitoring-plant-occurrence/23235](https://portal.tern.org.au/tern-surveillance-monitoring-plant-occurrence/23235).
- 586 Steffen, W. (2009). *Australia’s Biodiversity and Climate Change*. CSIRO Publishing.
- 587 Thornhill, A. H., Mishler, B. D., Knerr, N. J., González-Orozco, C. E., Costion, C. M., Crayn, D. M.,  
588 et al. (2016). Continental-scale spatial phylogenetics of Australian angiosperms provides  
589 insights into ecology, evolution and conservation. *J. Biogeogr.* 43, 2085–2098.  
590 doi:10.1111/jbi.12797.
- 591 Tuomisto, H. (2010a). A diversity of beta diversities: straightening up a concept gone awry. Part 1.  
592 Defining beta diversity as a function of alpha and gamma diversity. *Ecography* 33, 2–22.  
593 doi:10.1111/j.1600-0587.2009.05880.x.
- 594 Tuomisto, H. (2010b). A diversity of beta diversities: straightening up a concept gone awry. Part 2.  
595 Quantifying beta diversity and related phenomena. *Ecography* 33, 23–45.
- 596 Večeřa, M., Divíšek, J., Lenoir, J., Jiménez-Alfaro, B., Biurrun, I., Knollová, I., et al. (2019). Alpha  
597 diversity of vascular plants in European forests. *Journal of Biogeography* 46, 1919–1935.  
598 doi:10.1111/jbi.13624.
- 599 Venn, S., Kirkpatrick, J., McDougall, K., Walsh, N., Whinam, J., and Williams, R. J. (2017).  
600 “Alpine, sub-alpine and sub-Antarctic vegetation of Australia,” in *Australian Vegetation*  
601 (Cambridge University Press), 461–489.
- 602 Venter, O., Sanderson, E. W., Magrath, A., Allan, J. R., Beher, J., Jones, K. R., et al. (2016). Global  
603 terrestrial Human Footprint maps for 1993 and 2009. *Sci Data* 3, 160067.  
604 doi:10.1038/sdata.2016.67.
- 605 Whittaker, R. H. (1960). Vegetation of the Siskiyou Mountains, Oregon and California. *Ecological*  
606 *Monographs* 30, 279–338. doi:10.2307/1943563.
- 607 Whittaker, R. H. (1972). Evolution and measurement of species diversity. *TAXON* 21, 213–251.  
608 doi:10.2307/1218190.
- 609 Wilson, J. B., Peet, R. K., Dengler, J., and Pärtel, M. (2012). Plant species richness: the world  
610 records. *Journal of Vegetation Science* 23, 796–802. doi:10.1111/j.1654-1103.2012.01400.x.
- 611 Yeates, D. K., Metcalf, D. J., Westcott, D. A., and Butler, A. (2014). “Australia’s biodiversity: status  
612 and trends,” in *Biodiversity: Science and Solutions for Australia* (Melbourne: CSIRO  
613 Publishing).
- 614 Zizka, A., Antonelli, A., and Silvestro, D. (2021). sampbias, a method for quantifying geographic  
615 sampling biases in species distribution data. *Ecography* 44, 25–32. doi:10.1111/ecog.05102.
